# Supplementary material for: The Association of Inflammatory Markers With Nonalcoholic Fatty Liver Disease Differs by Human Immunodeficiency Virus Serostatus
Source: PubMed Central journal article supplement (PMC5601080; doi:10.1093/ofid/ofx153), 2017-07-23
Supplement: ofx153_suppl_supplementary_data.pdf [file ofx153_suppl_supplementary_data.pdf]

## SUPPLEMENTAL DATA

### Supplementary Methods

**Interassay coefficient of variation ranges for biomarkers:** 5.26% to 10.79% for adiponectin, 5.94% to 6.83% for leptin, 4.5% to 5.2% for CRP, 4.14% to 5.1% for cystatin C, 4% to 17% for d-dimer, 1.03% to 6.69% for fibrinogen, 3.99% to 5.22% for sCD14, 1.71% to 5.8% for sCD163, 3.23% to 4.06% for MCP-1, 3.3% to 7% for ICAM-1, 7% to 12% for IL-6, 10.41% to 12.45% for RANKL, 8.74% to 13.53% for osteoprotegerin, 4.62% to 10.8% for sTNF $\alpha$ R1, and 4.23% to 7.93% for sTNF $\alpha$ R2.

### Supplemental Figure: Flow-chart showing selection of study population

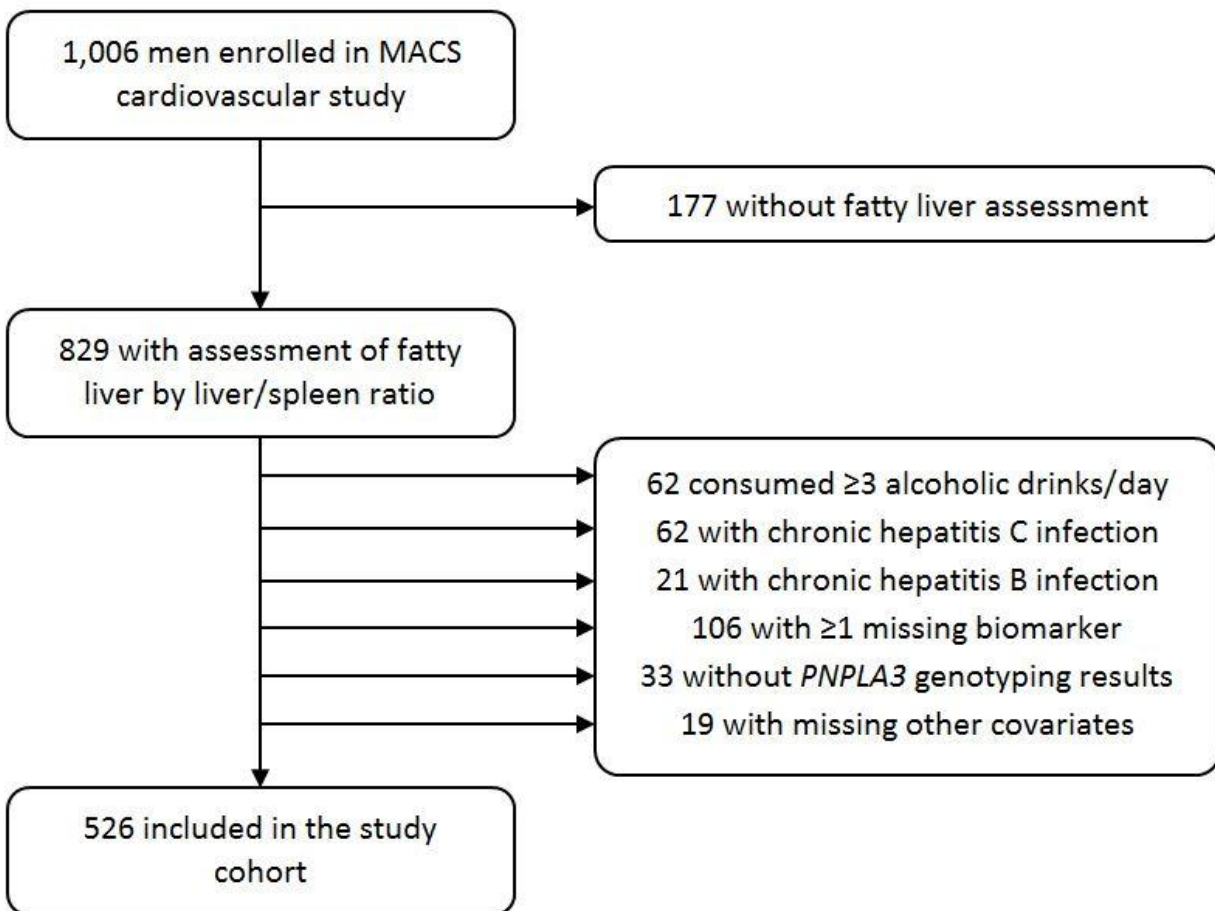

**Supplemental Table 1. Association of biomarkers with visceral adipose tissue (VAT) by HIV serostatus**

|                 | HIV+ (N=329)                |                  | HIV- (N=197)                |                  |
|-----------------|-----------------------------|------------------|-----------------------------|------------------|
|                 | Difference in VAT (95% CI)* | p-value          | Difference in VAT (95% CI)* | p-value          |
| ICAM-1†         | -1.1 (-14.0, 11.8)          | 0.87             | <b>30.7 (6.7, 54.7)</b>     | <b>0.01</b>      |
| Adiponectin     | <b>-27.4 (-36.5, -18.3)</b> | <b>&lt;0.001</b> | <b>-28.9 (-43.3, -14.5)</b> | <b>&lt;0.001</b> |
| CRP†            | <b>12.2 (5.9, 18.4)</b>     | <b>&lt;0.001</b> | <b>24.3 (17.1, 31.6)</b>    | <b>&lt;0.001</b> |
| IL-6†           | 7.5 (-1.6, 16.6)            | 0.11             | <b>32.1 (18.9, 45.3)</b>    | <b>&lt;0.001</b> |
| MCP1            | 13.4 (-1.6, 28.3)           | 0.08             | 4.8 (-17.8, 27.3)           | 0.68             |
| TNFαR2          | 7.8 (-13.4, 29.0)           | 0.47             | <b>39.5 (7.9, 71.0)</b>     | <b>0.02</b>      |
| Osteoprotegerin | -7.8 (-27.5, 11.9)          | 0.44             | 0.1 (-30.5, 30.8)           | 0.99             |
| sCD163          | 1.8 (-2.2, 5.9)             | 0.37             | <b>7.4 (1.4, 13.4)</b>      | <b>0.02</b>      |
| sCD14           | <b>-18.6 (-32.1, -5.1)</b>  | <b>0.007</b>     | 1.1 (-23.4, 25.6)           | 0.93             |
| Cystatin C      | 26.5 (-4.2, 57.2)           | 0.09             | <b>108.8 (54.0, 163.6)</b>  | <b>&lt;0.001</b> |
| D-dimer         | 2.4 (-5.3, 10.1)            | 0.54             | <b>10.4 (0.6, 20.1)</b>     | <b>0.04</b>      |
| Fibrinogen      | -0.9 (-17.4, 15.6)          | 0.91             | 36.5 (-8.5, 81.6)           | 0.11             |
| IL-18           | 3.2 (-6.5, 12.9)            | 0.51             | 3.5 (-6.4, 13.4)            | 0.49             |
| RANKL           | -1.8 (-7.2, 3.5)            | 0.51             | 3.1 (-4.2, 10.3)            | 0.41             |
| TNFαR1          | 15.1 (-6.6, 36.8)           | 0.17             | <b>29.1 (5.0, 53.2)</b>     | <b>0.02</b>      |
| Leptin          | <b>37.8 (31.9, 43.7)</b>    | <b>&lt;0.001</b> | <b>45.6 (37.8, 53.4)</b>    | <b>&lt;0.001</b> |

Bold signifies statistical significance.

\*Difference in VAT was calculated using multivariable linear regression models for each 2 times increase in the levels of biomarkers. All models were adjusted for MACS study site, age and race.

†Test for interaction between HIV and biomarker was statistically significant with p<0.05

**Abbreviations:** sCD14, soluble CD14; sCD163, soluble CD163; ICAM-1, intercellular adhesion molecule 1; IL-6, interleukin 6; IL-18, interleukin 18; MCP1, monocyte chemoattractant protein 1; RANKL, receptor activator of nuclear factor kappa B ligand; TNFαR1, tumor necrosis factor α receptor 1; TNFαR2, tumor necrosis factor α receptor 2; VAT, abdominal visceral adipose tissue; CI, confidence interval

**Supplemental Table 2. Association of biomarkers with fatty liver by HIV serostatus**

|                 |                 | HIV+ (N=329)                         |                  | HIV- (N=197)                         |                  |                   |
|-----------------|-----------------|--------------------------------------|------------------|--------------------------------------|------------------|-------------------|
|                 |                 | Odds ratio for fatty liver (95% CI)* | p-value          | Odds ratio for fatty liver (95% CI)* | p-value          | p for interaction |
| sCD14           | Model A         | 0.72 (0.49-1.07)                     | 0.10             | 0.96 (0.46-1.99)                     | 0.90             | 0.50              |
|                 | + HOMA-IR       | 0.79 (0.54-1.17)                     | 0.24             | 0.85 (0.41-1.77)                     | 0.67             | 0.87              |
|                 | + VAT           | 0.83 (0.54-1.27)                     | 0.40             | 0.97 (0.41-2.27)                     | 0.94             | 0.80              |
|                 | + HOMA-IR + VAT | 0.86 (0.56-1.32)                     | 0.48             | 0.87 (0.39-1.97)                     | 0.75             | 0.99              |
| sCD163          | Model A         | 1.13 (0.59-2.18)                     | 0.72             | <b>2.99 (1.30-6.90)</b>              | <b>0.01</b>      | 0.06              |
|                 | + HOMA-IR       | 0.73 (0.35-1.50)                     | 0.39             | <b>2.98 (1.19-7.43)</b>              | <b>0.02</b>      | <b>0.01</b>       |
|                 | + VAT           | 0.87 (0.42-1.82)                     | 0.71             | 2.32 (0.96-5.61)                     | 0.06             | 0.07              |
|                 | + HOMA-IR + VAT | 0.66 (0.30-1.45)                     | 0.30             | 2.49 (0.99-6.30)                     | 0.054            | <b>0.02</b>       |
| Fibrinogen      | Model A         | 0.94 (0.58-1.51)                     | 0.79             | 2.81 (0.64-12.27)                    | 0.17             | 0.15              |
|                 | + HOMA-IR       | 0.88 (0.54-1.44)                     | 0.61             | 2.33 (0.51-10.65)                    | 0.28             | 0.22              |
|                 | + VAT           | 0.94 (0.59-1.50)                     | 0.81             | 2.08 (0.47-9.08)                     | 0.33             | 0.27              |
|                 | + HOMA-IR + VAT | 0.90 (0.56-1.44)                     | 0.67             | 2.12 (0.45-9.90)                     | 0.34             | 0.25              |
| TNF $\alpha$ R2 | Model A         | 1.19 (0.57-2.46)                     | 0.64             | <b>9.11 (2.78-29.80)</b>             | <b>&lt;0.001</b> | <b>0.004</b>      |
|                 | + HOMA-IR       | 1.05 (0.49-2.28)                     | 0.90             | <b>7.90 (2.24-27.82)</b>             | <b>0.001</b>     | <b>0.01</b>       |
|                 | + VAT           | 0.94 (0.42-2.09)                     | 0.87             | <b>6.55 (1.90-22.53)</b>             | <b>0.003</b>     | <b>0.01</b>       |
|                 | + HOMA-IR + VAT | 0.91 (0.41-2.04)                     | 0.82             | <b>6.61 (1.85-23.67)</b>             | <b>0.004</b>     | <b>0.01</b>       |
| Adiponectin     | Model A         | <b>0.53 (0.38-0.74)</b>              | <b>&lt;0.001</b> | <b>0.45 (0.27-0.74)</b>              | <b>0.002</b>     | 0.71              |
|                 | + HOMA-IR       | <b>0.61 (0.43-0.88)</b>              | <b>0.01</b>      | <b>0.53 (0.31-0.91)</b>              | <b>0.02</b>      | 0.72              |
|                 | + VAT           | <b>0.57 (0.40-0.83)</b>              | <b>0.003</b>     | <b>0.51 (0.29-0.89)</b>              | <b>0.02</b>      | 0.90              |
|                 | + HOMA-IR + VAT | <b>0.61 (0.42-0.90)</b>              | <b>0.01</b>      | <b>0.55 (0.31-0.98)</b>              | <b>0.04</b>      | 0.85              |
| CRP             | Model A         | 1.18 (0.94-1.49)                     | 0.15             | <b>2.02 (1.49-2.74)</b>              | <b>&lt;0.001</b> | <b>0.01</b>       |
|                 | + HOMA-IR       | 1.16 (0.91-1.47)                     | 0.23             | <b>1.74 (1.27-2.39)</b>              | <b>0.001</b>     | 0.07              |
|                 | + VAT           | 1.00 (0.78-1.29)                     | 0.99             | <b>1.66 (1.21-2.30)</b>              | <b>0.002</b>     | <b>0.03</b>       |
|                 | + HOMA-IR + VAT | 1.02 (0.79-1.32)                     | 0.88             | <b>1.57 (1.13-2.19)</b>              | <b>0.01</b>      | 0.08              |
| Cystatin C      | Model A         | 2.28 (0.81-6.40)                     | 0.12             | 4.59 (0.76-27.52)                    | 0.10             | 0.41              |
|                 | + HOMA-IR       | 1.95 (0.64-6.00)                     | 0.24             | 1.84 (0.28-12.28)                    | 0.53             | 0.70              |
|                 | + VAT           | 1.55 (0.47-5.09)                     | 0.47             | 1.43 (0.21-9.66)                     | 0.72             | 0.67              |
|                 | + HOMA-IR + VAT | 1.45 (0.42-4.97)                     | 0.55             | 1.00 (0.14-7.12)                     | 1.00             | 0.74              |
| D-dimer         | Model A         | <b>1.32 (1.01-1.73)</b>              | <b>0.046</b>     | 1.19 (0.88-1.62)                     | 0.26             | 0.56              |
|                 | + HOMA-IR       | 1.27 (0.95-1.70)                     | 0.10             | 1.00 (0.73-1.37)                     | 1.00             | 0.29              |
|                 | + VAT           | 1.34 (1.00-1.79)                     | 0.05             | 1.07 (0.77-1.48)                     | 0.69             | 0.28              |
|                 | + HOMA-IR + VAT | 1.30 (0.96-1.76)                     | 0.09             | 0.96 (0.69-1.34)                     | 0.82             | 0.23              |
| ICAM-1          | Model A         | <b>3.21 (1.45-7.12)</b>              | <b>0.004</b>     | <b>8.18 (2.74-24.41)</b>             | <b>&lt;0.001</b> | 0.09              |
|                 | + HOMA-IR       | <b>2.48 (1.14-5.39)</b>              | <b>0.02</b>      | <b>6.00 (1.89-19.06)</b>             | <b>0.002</b>     | 0.11              |
|                 | + VAT           | <b>2.67 (1.15-6.19)</b>              | <b>0.02</b>      | <b>5.30 (1.71-16.46)</b>             | <b>0.004</b>     | 0.22              |
|                 | + HOMA-IR + VAT | <b>2.41 (1.06-5.49)</b>              | <b>0.04</b>      | <b>4.74 (1.46-15.33)</b>             | <b>0.01</b>      | 0.21              |
| IL-18           | Model A         | 1.03 (0.72-1.46)                     | 0.89             | 0.96 (0.70-1.31)                     | 0.79             | 0.75              |
|                 | + HOMA-IR       | 0.93 (0.64-1.34)                     | 0.68             | 0.97 (0.69-1.36)                     | 0.85             | 0.80              |
|                 | + VAT           | 0.95 (0.65-1.39)                     | 0.79             | 0.90 (0.62-1.32)                     | 0.60             | 0.87              |
|                 | + HOMA-IR + VAT | 0.90 (0.61-1.33)                     | 0.60             | 0.93 (0.64-1.36)                     | 0.71             | 0.85              |
| IL-6            | Model A         | 1.26 (0.92-1.72)                     | 0.14             | <b>2.11 (1.38-3.24)</b>              | <b>0.001</b>     | 0.06              |
|                 | + HOMA-IR       | 1.18 (0.84-1.66)                     | 0.34             | <b>1.86 (1.18-2.93)</b>              | <b>0.01</b>      | 0.13              |
|                 | + VAT           | 1.16 (0.81-1.66)                     | 0.42             | <b>1.67 (1.06-2.64)</b>              | <b>0.03</b>      | 0.19              |
|                 | + HOMA-IR + VAT | 1.12 (0.77-1.62)                     | 0.56             | <b>1.63 (1.01-2.63)</b>              | <b>0.04</b>      | 0.18              |
| Leptin          | Model A         | <b>1.46 (1.12-1.91)</b>              | <b>0.01</b>      | <b>1.67 (1.18-2.38)</b>              | <b>0.004</b>     | 0.48              |
|                 | + HOMA-IR       | 1.21 (0.91-1.61)                     | 0.20             | 1.27 (0.86-1.86)                     | 0.23             | 0.58              |
|                 | + VAT           | 0.93 (0.67-1.31)                     | 0.70             | 1.02 (0.65-1.59)                     | 0.94             | 0.58              |
|                 | + HOMA-IR + VAT | 0.86 (0.61-1.23)                     | 0.41             | 0.89 (0.56-1.42)                     | 0.62             | 0.57              |
| MCP1            | Model A         | 1.87 (0.96-3.65)                     | 0.07             | 1.32 (0.66-2.67)                     | 0.43             | 0.35              |
|                 | + HOMA-IR       | 1.70 (0.86-3.36)                     | 0.13             | 1.38 (0.64-2.97)                     | 0.41             | 0.60              |
|                 | + VAT           | 1.72 (0.85-3.49)                     | 0.13             | 1.28 (0.58-2.85)                     | 0.54             | 0.57              |
|                 | + HOMA-IR + VAT | 1.64 (0.81-3.32)                     | 0.17             | 1.33 (0.58-3.04)                     | 0.50             | 0.71              |

|                 |                 |                         |              |                  |      |      |
|-----------------|-----------------|-------------------------|--------------|------------------|------|------|
| Osteoprotegerin | Model A         | <b>0.52 (0.27-0.99)</b> | <b>0.046</b> | 1.73 (0.63-4.77) | 0.29 | 0.08 |
|                 | + HOMA-IR       | 0.50 (0.25-1.01)        | 0.053        | 1.36 (0.48-3.89) | 0.56 | 0.14 |
|                 | + VAT           | <b>0.48 (0.24-0.94)</b> | <b>0.03</b>  | 1.67 (0.59-4.76) | 0.34 | 0.07 |
|                 | + HOMA-IR + VAT | <b>0.48 (0.24-0.97)</b> | <b>0.04</b>  | 1.40 (0.48-4.09) | 0.54 | 0.13 |
| RANKL           | Model A         | 0.99 (0.82-1.19)        | 0.90         | 0.99 (0.79-1.24) | 0.94 | 0.86 |
|                 | + HOMA-IR       | 1.01 (0.82-1.23)        | 0.96         | 1.08 (0.85-1.38) | 0.53 | 0.65 |
|                 | + VAT           | 1.02 (0.84-1.24)        | 0.82         | 0.97 (0.76-1.23) | 0.80 | 0.82 |
|                 | + HOMA-IR + VAT | 1.03 (0.84-1.25)        | 0.79         | 1.04 (0.81-1.33) | 0.77 | 0.92 |
| TNF $\alpha$ R1 | Model A         | 1.25 (0.58-2.74)        | 0.57         | 2.34 (0.91-6.02) | 0.08 | 0.18 |
|                 | + HOMA-IR       | 1.13 (0.50-2.56)        | 0.78         | 1.80 (0.70-4.62) | 0.22 | 0.24 |
|                 | + VAT           | 0.94 (0.40-2.20)        | 0.89         | 1.64 (0.63-4.29) | 0.32 | 0.17 |
|                 | + HOMA-IR + VAT | 0.91 (0.38-2.18)        | 0.84         | 1.53 (0.58-4.03) | 0.39 | 0.18 |

Bold signifies statistical significance at p-value<0.05.

\*Odds ratios are calculated for each 2 times increase in the levels of biomarkers. Model A was adjusted for MACS study site, age, race and *PNPLA3* genotype. P for interaction tested potential interaction between biomarkers and HIV serostatus.

**Abbreviations:** sCD14, soluble CD14; sCD163, soluble CD163; ICAM-1, intercellular adhesion molecule 1; IL-6, interleukin 6; IL-18, interleukin 18; MCP1, monocyte chemoattractant protein 1; RANKL, receptor activator of nuclear factor kappa B ligand; TNF $\alpha$ R1, tumor necrosis factor  $\alpha$  receptor 1; TNF $\alpha$ R2, tumor necrosis factor  $\alpha$  receptor 2; OR, odds ratio; CI, confidence interval; HOMA-IR, homeostatic model assessment of insulin resistance; VAT, abdominal visceral adipose tissue.
